# Supplementary material
Source: Research Square preprint supplement (doi:10.21203/rs.3.rs-9485032/v1)
Supplement: Supplementary file 1 [file b522d04fa9ad592f8f8140f2.docx]

Supplementary Information for

**A Data-Driven Strategy for Deterministic Stacking Control of 2D Perovskite Single Crystals**

Jingyan Qi1, Wei Meng1, Feiyue Lu1, Ziyu Xiong1, Jialin Wu1, Xingwang Kang1, Qianyao Zhu1, Xiaozhen Chen1, Zengqi Xie1, Xu Wang1, Bin Hu1, Liqun Liu1, Yuguang Ma1, Ning Li1, 2*

*Corresponding author. E-mail: [ningli2022@scut.edu.cn](mailto:ningli2022@scut.edu.cn) (N.L.)

This file contains

Supplementary Note 1 – 2

Supplementary Tables 1 – 10

Supplementary Figures 1 – 15

References

### Supplementary Note 1. High-throughput preparation of two-dimensional perovskite single crystals and thin films

High-Throughput Processing Environments

Most of the experimental components of this work were accomplished using a self-constructed rapid and multifunctional high-throughput experimental platform for optoelectronic materials. This platform integrates an eight-channel liquid-handling robot (FCA, Flexible Channel Arm, Tecan Trading AG, Switzerland), which enables precise preparation of perovskite precursor solutions with varying compositions in a custom-designed 24-well plate. The system accommodates a wide range of liquid types and allows parameter adjustments through the FluentControl software to meet specific experimental requirements.

After solution preparation, the precursor solutions are deposited onto glass substrates via drop casting or spin coating to form perovskite thin films. To optimize the experimental workflow, we have designed and developed customized substrate trays, a spin coater (CY-SPC8-DZ, CY Scientific Instrument Co. Ltd, China), and an annealing hotplate (RCT basic S025, Aika (Guangzhou) Instrument Equipment Co., Ltd, China) to ensure efficient operation. Additionally, a robotic gripper arm (RGA, Tecan Trading AG, Switzerland) autonomously transfers glass substrates and trays between different functional modules, enabling a streamlined and fully automated material preparation and processing workflow.

Solution-phase method for synthesizing two-dimensional halide lead perovskite single crystals and thickness measurement

In this work, two-dimensional perovskite micro-sized single crystals have been synthesized using ternary solvents.

1. Preparation of Stock Solutions

First, we prepared a 5 mM 2D perovskite stock solution using DMF/o-DCB (v:v = 1:1) as the solvent. ACN/DCB (v:v = 0.1:9.5) co-solvent was prepared as a dilution solvent. In the mixed anti-solvent system, the boiling point of ACN is relatively low, and it is used to trigger the nucleation of perovskite. The main component of the solution was selected as the high-boiling-point polar non-volatile solvent o-DCB, which functioned to slow down the growth rate of the single crystal and promote the 2D growth direction in terms of kinetics.

2. High-Throughput Experimental Conditions

The entire experimental process was conducted in a nitrogen-filled glovebox. Initially, alkylamine and aromatic amine ligands were automatically diluted to the designated ratios using the FCA program. Subsequently, the RGA system transported the Si substrates to a heated stage for preheating. A precise volume of the perovskite dilute solution was then dispensed onto the substrate to facilitate single-crystal growth, which typically lasted between 1 and 3 minutes.

Step 1: Solution Dilution

Before starting the preparation of single crystals, we first dilute the solution. Based on the Concentration value recommended by machine learning, conduct the quantitative dilution of the solution. The Concentration value represents the dilution factor of the stock solution. Once the parameters were set, the high-throughput platform autonomously executed the dilution process.

Step 2: Drop Casting

The RGA system first transports the Si substrates to the heating platform and preheats them to the recommended temperature value. Subsequently, the FCA system sequentially aspirated 50~100 μL of perovskite solutions with different dilution factors and dispensed them onto the substrates. The single-crystal growth process was set to last 1 ~ 3 minutes. Upon completion, the RGA system automatically transferred the drop-cast substrates to the designated tray, finalizing the sample preparation process. The entire procedure was executed according to predefined protocols, with FCA capable of simultaneously processing four substrates in a single run, maintaining an operation time of under one minute.

3. Automated measurement of single crystal thickness

After the preparation of the single crystal is completed, the RGA system will move the Si substrate onto the testing surface of the step meter. The probe of the step meter will automatically select 2 to 5 non-repeating paths for the measurement of the surface morphology of the silicon substrate. Since the surface roughness of the Si substrate used is 0.5 ~ 1 nm, which is lower than the minimum thickness that a single crystal can achieve, it will not affect the testing of the single crystal thickness. Subsequently, the surface morphology data of the Si substrate will be input into the self-developed recognition program. The program will identify the measured single crystal thickness along the path and finally output the statistical value of the single crystal thickness.

Preparation of two-dimensional perovskite thin films

1. Preparation of Stock Solutions

A 1M 2D perovskite precursor solution was prepared by dissolving precursor component in DMF at 1:2 (mol: mol). The dissolved solution was filtered with a 0.22 μm PTFE hydrophobic filter tip to remove impurities.

2. High-Throughput Experimental Conditions

The entire experiment was conducted in a nitrogen-filled glovebox. First, the prepared precursor solution was spin-coated onto glass substrates. The RGA system then transported the coated substrates to a heated stage, where a specified volume of perovskite dilute solution was dispensed onto the surface, followed by the addition of an antisolvent. Finally, the substrates underwent an annealing process to complete the fabrication.

Step 1: Spin Coating

The RGA system transferred the glass substrates from the tray to the spin coater. The FCA system then precisely dispensed 50 μL of precursor solution, except for the components with DDA, HDA, and ODA as ligands onto each substrate, initiating the spin-coating process. The spin coater was set to operate at 4000 rpm for 30 seconds. At the 20-second mark, the FCA system dispensed 150 μL of o-dichlorobenzene (o-DCB) onto the substrate, ensuring a controlled dispensing time within 1 second. For the components with DDA, HDA, and ODA as ligands, due to their poor solution wettability, the dynamic spin coating method needs to be used. Preheat the substrate at 70 ℃ for 10 minutes, then place the preheated substrate on the glue applicator and spin-coat it at 4000 rpm for 30 seconds. The RGA system will first place the glass substrate on the heating platform and preheat it at 70 ℃ for 10 minutes. Subsequently, the RGA system transfers the pre-heated glass substrate to the coating machine and initiates the spin-coating process. The time taken for this transfer is controlled within 3 seconds to ensure that the heat of the substrate does not dissipate.

Step 2: Thermal Annealing

After spin coating, the RGA system transferred the glass substrates to a heated stage for annealing at 70 ℃ for 10 minutes. Upon completion, the RGA system relocated the annealed substrates to the designated tray, finalizing the process.

### Supplementary Note 2. DFT simulation for two-dimensional perovskite solution and crystal

Using Material Studio simulation software, the ligands were replaced with known (BA)2PbI4 cell parameters and symmetry to build the remaining two-dimensional perovskite singlet cells, yielding the space group as PBCA and the ligands as HA+, HeptA+, OA+, NonylA+, DA+, DDA+, HAD+, ODA+, PEA+, PPA+, and PBA+ for single-cell models. Geometry optimization of single cells was done using the *Forcite* module, using *Universal force field* with *Ultra-fine Quality*, and molecular dynamics geometry optimization results were obtained for single cells. Further geometry optimization of the single cell was done using the *CASTEP* module with *Ultra-fine* for *Quality*, GGA-PBE chosen for generalization, *Non-polarized*, truncation energy of 570.00 eV, *Pseudopotentials* of OTFG ultrasoft, *Relativistic treatment* is Koeling-Hamon, and quantum mechanical geometry optimization results for 14 single cells are obtained. The energy band structure of the optimized single cell was calculated using the *DMol3* module, with the generalized function chosen as GGA-PBE and the *Quality* as *Fine*1,2. According to the cell symmetry, the k-point path is set as R (0.5 0.5 0.5) – (0 0 0) – X (0.5 0 0) – M (0.5 0.5 0) – R (0.5 0.5 0.5) – X (0.5 0 0) – M (0.5 0.5 0) – (0 0 0) in inverted space, and the energy band structure as well as the bandgap values of the single cells are obtained.

The electrostatic potentials were further calculated using the *DMol3* module, with the generalized function chosen as GGA-PBE and the *Quality* as *Fine*, to obtain the electrostatic potentials of the carbon chain of ligand structures schematically3.

### Table S. Characteristic value codes

|  | **A** | **π** |  | **B** |  | **X** |
| --- | --- | --- | --- | --- | --- | --- |
| **HA** | 6 | 0 | **Pb1Sn0** | 1 | **Br1I0** | 1 |
| **HeptA** | 7 | 0 | **Pb0.9Sn0.1** | 2 | **Br0.9I0.1** | 2 |
| **OA** | 8 | 0 | **Pb0.8Sn0.2** | 3 | **Br0.8I0.2** | 3 |
| **NonylA** | 9 | 0 | **Pb0.7Sn0.3** | 4 | **Br0.7I0.3** | 4 |
| **DA** | 10 | 0 | **Pb0.6Sn0.4** | 5 | **Br0.6I0.4** | 5 |
| **DDA** | 12 | 0 | **Pb0.5Sn0.5** | 6 | **Br0.5I0.5** | 6 |
| **HDA** | 16 | 0 | **Pb0.4Sn0.6** | 7 | **Br0.4I0.6** | 7 |
| **ODA** | 18 | 0 | **Pb0.3Sn0.7** | 8 | **Br0.3I0.7** | 8 |
| **PEA** | 2 | 1 | **Pb0.2Sn0.8** | 9 | **Br0.2I0.8** | 9 |
| **PPA** | 3 | 1 | **Pb0.1Sn0.9** | 10 | **Br0.1I0.9** | 10 |
| **PBA** | 4 | 1 | **Pb0Sn1** | 11 | **Br0I1** | 11 |

### Table S. TRPL fitting results of 2D perovskite thin film

The tail index model was fitted according to the following equation:

|  |  | **A1**  **[kCnts/Chnl]** | **τ1[ns]** | **A2**  **[kCnts/Chnl]** | **τ2[ns]** | **A3**  **[kCnts/Chnl]** | **τ3[ns]** | **A4**  **[kCnts/Chnl]** | **τ4[ns]** | **τAvInt[ns]** |
| --- | --- | --- | --- | --- | --- | --- | --- | --- | --- | --- |
| **L2PbBr4** | (HA)2PbBr4 | 2.23 | 1.37 | 0.073 | 7.5 | 5.35 | 0.333 | -- | -- | 1.629 |
| (OA)2PbBr4 | 1.09 | 3.77 | 0.0264 | 35.4 | 5.83 | 0.94 | -- | -- | 5.12 |
| (NA)2PbBr4 | 2.41 | 2.89 | 0.0031 | 76 | 5.07 | 1.134 | -- | -- | 3.41 |
| (DDA)2PbBr4 | 1.16 | 5.45 | 0.2577 | 70.7 | 6.34 | 2.543 | -- | -- | 33.55 |
| (PEA)2PbBr4 | 1.54 | 1.61 | 0.0291 | 14.8 | 5.89 | 0.449 | -- | -- | 2.08 |
| (PPA)2PbBr4 | 0.75 | 3.6 | 0.038 | 23 | 3.98 | 0.72 | -- | -- | 4.94 |
| (PBA)2PbBr4 | 1.5 | 5.68 | 0.0519 | 32.7 | 5.52 | 1.669 | -- | -- | 6.14 |
| **L2PbI4** | (HA)2PbI4 | 0.0311 | 5.27 | 1.28 | 0.779 | 6.55 | 0.163 | -- | -- | 0.814 |
| (OA)2PbI4 | 0.59 | 1.42 | 7.01 | 0.22 | -- | -- | -- | -- | 0.634 |
| (NA)2PbI4 | 0.15 | 4.55 | 61.8 | 0.1483 | 11.18 | 0.643 | -- | -- | 0.534 |
| (DDA)2PbI4 | 0.165 | 7.05 | 38.3 | 0.151 | 17.8 | 0.694 | -- | -- | 0.914 |
| (PEA)2PbI4 | 0.222 | 4.85 | 61.5 | 0.1342 | 8.78 | 0.771 | -- | -- | 0.717 |
| (PPA)2PbI4 | 0.452 | 7.09 | 50.6 | 0.285 | 27.9 | 0.832 | -- | -- | 1.129 |
| (PBA)2PbI4 | 0.0217 | 47.5 | 61.4 | 0.1775 | 1.31 | 4.76 | 17.3 | 0.925 | 2.79 |
| **L2SnI4** | (HA)2SnI4 | 3.07 | 1.592 | 4.06 | 0.232 | 0.357 | 7.45 | -- | -- | 3.273 |
| (OA)2SnI4 | 0.933 | 0.777 | 6.618 | 0.1213 | 0.0079 | 36 | -- | -- | 5.8 |
| (NA)2SnI4 | 0.684 | 0.791 | 0.0135 | 47.8 | 4.6 | 0.1264 | -- | -- | 17.69 |
| (DDA)2SnI4 | 48.63 | 0.1470 | 21.26 | 0.8698 | 1.342 | 3.457 | -- | -- | 1.0954 |
| (PEA)2SnI4 | 39.1 | 0.297 | 37.1 | 0.967 | 0.532 | 5.32 | -- | -- | 1.0565 |
| (PPA)2SnI4 | 0.144 | 0.511 | 0.0648 | 3.26 | 0.0146 | 173 | -- | -- | 12.6 |
| (PBA)2SnI4 | 67.2 | 67.2 | 7.64 | 0.673 | 0.0740 | 6.61 | -- | -- | 0.541 |

### Table S. The calculated and measured band gap values of the pure two-dimensional perovskite, as well as the calculated values of the unit cell parameters

In this paper, we calculate the band gap of this component using the peak position of the highest emission peak of the two-dimensional perovskite film's PL spectrum. We also correct the calculated values of the band gap using the PL spectrum and adjust the unit cell parameters calculated by DFT and the calculated band gap value under this electronic structure. This ensures the accuracy and credibility of the DFT calculation of the unit cell structure. The gap calculated by DFT is within the inherent difference of DFT calculation (30% ~ 50%). Thus, the calculated results are within the error range, and the optimized structure of the unit cell is reliable.

|  |  | **Bandgap (eV)** | | **Cell Parameters** | | | | | |
| --- | --- | --- | --- | --- | --- | --- | --- | --- | --- |
|  |  | **DFT Calculation** | **PL Experiment** | **a** | **b** | **c** | **α** | **β** | **γ** |
| **L2PbBr4** | (HA)2PbBr4 | 2.273 | 2.725 | 8.6188 | 9.4735 | 30.783 | 90 | 90 | 90 |
| (OA)2PbBr4 | 2.449 | 3.100 | 8.7186 | 10.092 | 37.961 | 90 | 90 | 90 |
| (NA)2PbBr4 | 2.355 | 3.100 | 9.4349 | 9.0539 | 41.999 | 90 | 90 | 90 |
| (DDA)2PbBr4 | 2.383 | 2.863 | 9.9366 | 8.7174 | 45.496 | 90 | 90 | 90 |
| (PEA)2PbBr4 | 2.664 | 2.952 | 8.6103 | 8.7577 | 37.643 | 90 | 90 | 90 |
| (PPA)2PbBr4 | 2.557 | 3.123 | 8.3703 | 9.0649 | 42.978 | 90 | 90 | 90 |
| (PBA)2PbBr4 | 2.595 | 3.123 | 9.0506 | 9.0698 | 36.608 | 90 | 90 | 90 |
| **L2PbI4** | (HA)2PbI4 | 1.130 | 1.950 | 8.6188 | 9.4735 | 30.783 | 90 | 90 | 90 |
| (OA)2PbI4 | 1.201 | 1.965 | 8.7186 | 10.092 | 37.961 | 90 | 90 | 90 |
| (NA)2PbI4 | 1.318 | 1.965 | 9.4349 | 9.0539 | 41.999 | 90 | 90 | 90 |
| (DDA)2PbI4 | 1.072 | 2.081 | 9.9366 | 8.7174 | 45.496 | 90 | 90 | 90 |
| (PEA)2PbI4 | 1.132 | 1.921 | 8.6103 | 8.7577 | 37.643 | 90 | 90 | 90 |
| (PPA)2PbI4 | 1.094 | 2.090 | 8.3703 | 9.0649 | 42.978 | 90 | 90 | 90 |
| (PBA)2PbI4 | 1.210 | 1.988 | 9.0506 | 9.0698 | 36.608 | 90 | 90 | 90 |
| **L2SnI4** | (HA)2SnI4 | 1.993 | 2.009 | 8.6188 | 9.4735 | 30.783 | 90 | 90 | 90 |
| (OA)2SnI4 | 2.077 | 2.084 | 8.7186 | 10.092 | 37.961 | 90 | 90 | 90 |
| (NA)2SnI4 | 2.000 | 2.000 | 9.4349 | 9.0539 | 41.999 | 90 | 90 | 90 |
| (DDA)2SnI4 | 2.067 | 2.066 | 9.9366 | 8.7174 | 45.496 | 90 | 90 | 90 |
| (PEA)2SnI4 | 1.950 | 1.904 | 8.6103 | 8.7577 | 37.643 | 90 | 90 | 90 |
| (PPA)2SnI4 | 2.084 | 2.094 | 8.3703 | 9.0649 | 42.978 | 90 | 90 | 90 |
| (PBA)2SnI4 | 1.971 | 1.842 | 9.0506 | 9.0698 | 36.608 | 90 | 90 | 90 |

### Table S. The accessible crystal PDF cards and the unit cell parameters in the cif files can be referred to

|  | **PDF/ref** | **a** | **b** | **c** | **α** | **β** | **γ** |
| --- | --- | --- | --- | --- | --- | --- | --- |
| **(HA)2PbI4** | 96-210-2944 | 8.687 | 8.941 | 32.703 | 90 | 90 | 90 |
| **(HeptA)2PbI4** | 96-701-7475 | 8.684 | 8.855 | 36.612 | 90 | 90 | 90 |
| **(OA)2PbI4** | 96-705-1998 | 9.046 | 8.692 | 31.424 | 90 | 91.586 | 90 |
| **(NA)2PbI4** | 96-701-7480 | 8.705 | 9.023 | 39.758 | 90 | 90 | 90 |
| **(DA)2PbI4** | 96-701-7482 | 8.487 | 8.831 | 43.949 | 90 | 90 | 90 |
| **(DDA)2PbI4** | ref 4 | 8.843 | 8.5023 | 48.988 | 90 | 90 | 90 |
| **(HDA)2PbI4** | 96-705-1995 | 8.522 | 8.817 | 59.291 | 90 | 90 | 90 |
| **(ODA)2PbI4** | 96-705-1997 | 8.54 | 8.783 | 64.447 | 90 | 90 | 90 |
| **(PEA)2PbI4** | ref 5 | 8.7389 | 8.7403 | 32.9952 | 84.646 | 84.657 | 89.643 |

### Table S. Parameters of pure two-dimensional perovskite unit cells of the BA series

|  | **PDF/ref** | **a** | **b** | **c** | **α** | **β** | **γ** |
| --- | --- | --- | --- | --- | --- | --- | --- |
| **(BA)2PbI4** | 96-210-2939 | 8.693 | 8.876 | 27.601 | 90 | 90 | 90 |
| **(BA)2PbBr4** | ref 6 | 8.3343 | 8.2225 | 27.6171 | 90 | 90 | 90 |
| **(BA)2SnI4** | ref 7 | 8.814 | 8.591 | 27.644 | 90 | 90 | 90 |

### Table S. The distribution of feature value recommended of the three-round machine learning

| **Round 1** | | | | | |
| --- | --- | --- | --- | --- | --- |
| **Feature** | **Min (nm)** | **25% (nm)** | **50% (nm)** | **75% (nm)** | **Max (nm)** |
| **A** | 5.178408 | 7.701632 | 9.089229 | 10.26729 | 14.35215 |
| **π** | 0 | 0 | 0 | 0 | 1 |
| **B** | 1.046493 | 2.619152 | 4.023404 | 5.420075 | 10.81572 |
| **X** | 1.002412 | 3.166095 | 5.084041 | 7.825011 | 10.94602 |
| **Temperature** | 24.12096 | 50.76606 | 58.66271 | 73.82868 | 107.5511 |
| **Concentration** | 103.8859 | 274.4675 | 458.7496 | 591.2346 | 719.6037 |
| **Round 2** | | | | | |
| **Feature** | **Min (nm)** | **25% (nm)** | **50% (nm)** | **75% (nm)** | **Max (nm)** |
| **A** | 9.507058 | 10.13659 | 10.72215 | 11.35878 | 11.98982 |
| **π** | 0 | 0 | 0 | 0 | 0 |
| **B** | 1.046868 | 2.80664 | 4.639904 | 8.16869 | 10.95243 |
| **X** | 1.013227 | 3.930661 | 7.294036 | 9.125003 | 10.95389 |
| **Temperature** | 50.00811 | 55.36782 | 71.38405 | 81.84176 | 95.77629 |
| **Concentration** | 363.6444 | 473.2957 | 579.0193 | 685.0981 | 767.798 |
| **Round 3** | | | | | |
| **Feature** | **Min (nm)** | **25% (nm)** | **50% (nm)** | **75% (nm)** | **Max (nm)** |
| **A** | 8.001477 | 11.05897 | 12.13481 | 13.26422 | 14.39966 |
| **π** | 0 | 0 | 0 | 0 | 0 |
| **B** | 1.016808 | 5.090304 | 8.605294 | 9.799531 | 10.99811 |
| **X** | 1.003099 | 3.583748 | 7.143019 | 9.144473 | 10.99994 |
| **Temperature** | 40.05423 | 65.1034 | 77.42246 | 86.82229 | 95.9986 |
| **Concentration** | 384.0659 | 487.4513 | 582.0456 | 674.1714 | 767.9423 |

### Table S. Ligand chain RDKit feature value

|  | **HA** | **HeptA** | **OA** | **NonylA** | **DA** | **DDA** | **PEA** | **PPA** | **PBA** |
| --- | --- | --- | --- | --- | --- | --- | --- | --- | --- |
| **BertzCT** | 12 | 19.2193 | 25.0196 | 33.303 | 40 | 56.4386 | 141.384 | 152.949 | 164.653 |
| **EState_VSA8** | 13.8475 | 13.8475 | 13.8475 | 13.8475 | 13.8475 | 13.8475 | 31.1892 | 37.2556 | 37.2556 |
| **FpDensityMorgan1** | 0.8333 | 0.7143 | 0.625 | 0.5556 | 0.5 | 0.4167 | 1.125 | 1.1111 | 1.1 |
| **FpDensityMorgan2** | 1.1667 | 1.1429 | 1 | 0.8889 | 0.8 | 0.6667 | 1.75 | 1.7778 | 1.8 |
| **FpDensityMorgan3** | 1.3333 | 1.4286 | 1.25 | 1.2222 | 1.1 | 0.9167 | 2.125 | 2.3333 | 2.4 |
| **FractionCSP3** | 1 | 1 | 1 | 1 | 1 | 1 | 0.25 | 0.3333 | 0.4 |
| **HallKierAlpha** | 0 | 0 | 0 | 0 | 0 | 0 | -0.78 | -0.78 | -0.78 |
| **Kappa3** | 4 | 6 | 6 | 8 | 8 | 10 | 1.0935 | 1.8835 | 2.2189 |
| **MaxAbsEStateIndex** | 2.2318 | 2.2457 | 2.2559 | 2.2637 | 2.2699 | 2.279 | 2.162 | 2.2014 | 2.2251 |
| **MaxAbsPartialCharge** | 0.0654 | 0.0654 | 0.0654 | 0.0654 | 0.0654 | 0.0654 | 0.0622 | 0.0651 | 0.0654 |
| **MaxPartialCharge** | -0.0536 | -0.0533 | -0.0533 | -0.0533 | -0.0533 | -0.0533 | -0.0307 | -0.0281 | -0.0279 |
| **MinAbsEStateIndex** | 1.355 | 1.3611 | 1.3648 | 1.3672 | 1.3688 | 1.3709 | 1.1397 | 1.2092 | 1.2335 |
| **MinAbsPartialCharge** | 0.0536 | 0.0533 | 0.0533 | 0.0533 | 0.0533 | 0.0533 | 0.0307 | 0.0281 | 0.0279 |
| **MolLogP** | 2.5866 | 2.9767 | 3.3668 | 3.7569 | 4.147 | 4.9272 | 2.249 | 2.6391 | 3.0292 |
| **NumAromaticCarbocycles** | 0 | 0 | 0 | 0 | 0 | 0 | 1 | 1 | 1 |
| **PEOE_VSA6** | 39.5308 | 45.9516 | 52.3724 | 58.7932 | 65.214 | 78.0557 | 37.2556 | 43.6764 | 43.6764 |
| **Phi** | 5 | 6 | 7 | 8 | 9 | 11 | 1.6801 | 2.3153 | 3.0065 |
| **SPS** | 9 | 9.4286 | 9.75 | 10 | 10.2 | 10.5 | 9.125 | 9.4444 | 9.7 |

### Table S. TRPL fitting of ultrathin single crystals at 500 nm and 680 nm.

| **500 nm** | | | | | | | |
| --- | --- | --- | --- | --- | --- | --- | --- |
|  | **A1** | **τ1[ns]** | **A2** | **τ2[ns]** | **A3** | **τ3[ns]** | **τAvInt[ns]** |
|  | **[kCnts/Chnl]** | **[kCnts/Chnl]** | **[kCnts/Chnl]** |
| **(DDA)2Pb0.1Sn0.9(Br0.1I0.9)4** | 15.1 | 0.1477 | 0.0603 | 7.79 | 25.22 | 0.7046 | 0.8067 |
| **(HDA)2Pb0.1Sn0.9(Br0.1I0.9)4** | 68.5 | 0.1102 | 0.0399 | 6.3 | 4.63 | 0.711 | 0.429 |
| **(ODA)2Pb0.1Sn0.9(Br0.1I0.9)4** | 332.8 | 0.1141 | 22.3 | 0.647 | 0.176 | 7.48 | 0.4374 |
| **680 nm** | | | | | | | |
|  | **A1** | **τ1[ns]** | **A2** | **τ2[ns]** | **A3** | **τ3[ns]** | **τAvInt[ns]** |
|  | **[kCnts/Chnl]** | **[kCnts/Chnl]** | **[kCnts/Chnl]** |
| **(DDA)2Pb0.1Sn0.9(Br0.1I0.9)4** | 0.228 | 14.26 | 5.34 | 0.556 | 1.49 | 2.83 | 5.74 |
| **(HDA)2Pb0.1Sn0.9(Br0.1I0.9)4** | 0.328 | 13.59 | 5.04 | 0.599 | 1.73 | 3.7 | 6.2 |
| **(ODA)2Pb0.1Sn0.9(Br0.1I0.9)4** | 1.795 | 5.06 | 5.567 | 1.383 | 0.0733 | 26 | 5.68 |

### Table S. (DDA)2Pb0.1Sn0.9(Br0.1I0.9)4 were fitted by TRPL at 505nm and 680nm

| **505nm** | | | | | | | |
| --- | --- | --- | --- | --- | --- | --- | --- |
|  | **A1** | **τ1[ns]** | **A2** | **τ2[ns]** | **A3** | **τ3[ns]** | **τAvInt[ns]** |
|  | **[kCnts/Chnl]** | **[kCnts/Chnl]** | **[kCnts/Chnl]** |
| **80K** | 0.1543 | 53.4 | 3.539 | 0.789 | 3.349 | 7.74 | 17.4 |
| **120K** | 0.0163 | 50.8 | 0.364 | 0.8 | 0.329 | 7.56 | 16.89 |
| **160K** | 0.015 | 50.1 | 0.393 | 0.81 | 0.342 | 7.81 | 15.8 |
| **200K** | 0.0166 | 50.2 | 0.374 | 0.68 | 0.3433 | 7.54 | 16.67 |
| **240K** | 0.3396 | 7.456 | 0.0163 | 51.7 | 0.357 | 0.707 | 17.24 |
| **280K** | 0.324 | 7.12 | 0.0149 | 46.8 | 0.395 | 0.77 | 15 |
| **298K** | 0.3225 | 7.12 | 0.018 | 46.2 | 0.345 | 0.82 | 16.1 |
| **680nm** | | | | | | | |
|  | **A1** | **τ1[ns]** | **A2** | **τ2[ns]** | **A3** | **τ3[ns]** | **τAvInt[ns]** |
|  | **[kCnts/Chnl]** | **[kCnts/Chnl]** | **[kCnts/Chnl]** |
| **80K** | 0.235 | 63.9 | 0.227 | 4 | 0.32 | 16.4 | 49.6 |
| **120K** | 0.115 | 51 | 0.357 | 3.39 | 0.278 | 13.3 | 32.6 |
| **160K** | 0.0401 | 39.8 | 0.492 | 1.96 | 0.219 | 8.4 | 18.4 |
| **200K** | 0.0392 | 22.82 | 0.433 | 0.985 | 0.261 | 4.25 | 10.53 |
| **240K** | 0.126 | 4.82 | 0.0098 | 27 | 0.497 | 0.95 | 7.9 |
| **280K** | 0.139 | 2.48 | 0.0054 | 24 | 0.441 | 0.58 | 5.6 |
| **298K** | 0.219 | 1.2289 | 0.348 | 0 | -- | -- | 1.2289 |

### Table S. (HDA)2Pb0.1Sn0.9(Br0.1I0.9)4 were fitted by TRPL at 500nm and 680nm

| **500nm** | | | | | | | |
| --- | --- | --- | --- | --- | --- | --- | --- |
|  | **A1** | **τ1[ns]** | **A2** | **τ2[ns]** | **A3** | **τ3[ns]** | **τAvInt[ns]** |
|  | **[kCnts/Chnl]** | **[kCnts/Chnl]** | **[kCnts/Chnl]** |
| **80K** | 0.121 | 45.6 | 1.642 | 7.08 | 4.07 | 0.48 | 17.5 |
| **120K** | 1.994 | 7.3 | 3.49 | 0.53 | 0.143 | 46.5 | 18.05 |
| **160K** | 0.109 | 43.3 | 1.87 | 6.94 | 3.99 | 0.39 | 15.4 |
| **200K** | 1.794 | 7.04 | 4 | 0.4 | 0.101 | 42.3 | 14.6 |
| **240K** | 0.184 | 5.6 | 0.486 | 1.31 | 0.0284 | 26 | 10.8 |
| **280K** | 0.242 | 3.19 | 0.39 | 0.665 | 0.0324 | 16.4 | 7.24 |
| **298K** | 0.414 | 10.85 | 2.92 | 1.029 | 72.2 | 0.1014 | 3.55 |
| **680nm** | | | | | | | |
|  | **A1** | **τ1[ns]** | **A2** | **τ2[ns]** | **A3** | **τ3[ns]** | **τAvInt[ns]** |
|  | **[kCnts/Chnl]** | **[kCnts/Chnl]** | **[kCnts/Chnl]** |
| **80K** | 0.5956 | 82.7 | 0.136 | 9.25 | -- | -- | 80.9 |
| **120K** | 0.174 | 10.16 | 0.8221 | 99.7 | -- | -- | 97.8 |
| **160K** | 0.276 | 77 | 0.192 | 22.9 | -- | -- | 68 |
| **200K** | 0.123 | 52.2 | 0.074 | 14.8 | -- | -- | 46.8 |
| **240K** | 0.019 | 10.9 | 0.0298 | 41.7 | -- | -- | 37.4 |
| **280K** | 0.0221 | 34.6 | 0.0117 | 10 | -- | -- | 31.29 |
| **298K** | 0.075 | 24.058 | 0.011 | 0 | -- | -- | 25 |

### Table S. (ODA)2Pb0.1Sn0.9(Br0.1I0.9)4 were fitted by TRPL at 504nm and 700nm

| **504nm** | | | | | | | |
| --- | --- | --- | --- | --- | --- | --- | --- |
|  | **A1** | **τ1[ns]** | **A2** | **τ2[ns]** | **A3** | **τ3[ns]** | **τAvInt[ns]** |
|  | **[kCnts/Chnl]** | **[kCnts/Chnl]** | **[kCnts/Chnl]** |
| **80K** | 0.1522 | 44.9 | 3.133 | 6.86 | 3.97 | 0.7 | 14.65 |
| **120K** | 3.126 | 6.876 | 3.93 | 0.744 | 0.1491 | 44.3 | 14.24 |
| **160K** | 0.1496 | 43.73 | 3.054 | 6.872 | 3.7 | 0.74 | 14.29 |
| **200K** | 0.1451 | 45 | 3.77 | 0.771 | 3.049 | 6.88 | 14.47 |
| **240K** | 0.149 | 42.9 | 3.86 | 0.727 | 3.035 | 6.896 | 13.96 |
| **280K** | 3.161 | 6.859 | 0.1548 | 44.4 | 3.83 | 0.716 | 14.55 |
| **298K** | 0.1495 | 43.7 | 2.999 | 6.9 | 4.03 | 0.62 | 14.45 |
| **700nm** | | | | | | | |
|  | **A1** | **τ1[ns]** | **A2** | **τ2[ns]** | **A3** | **τ3[ns]** | **τAvInt[ns]** |
|  | **[kCnts/Chnl]** | **[kCnts/Chnl]** | **[kCnts/Chnl]** |
| **80K** | 0.3004 | 41.65 | 4.419 | 0.784 | 2.574 | 3.95 | 21.58 |
| **120K** | 0.94 | 2.38 | 6.2 | 0.17 | 0.0954 | 28 | 13.5 |
| **160K** | 0.117 | 28.9 | 4.96 | 0.684 | 1.4 | 3.87 | 9.93 |
| **200K** | 3.56 | 3.67 | 3.23 | 0.905 | 0.329 | 82.8 | 6.072 |
| **240K** | 1.8 | 1.55 | 0.131 | 9.6 | 4.64 | 0.26 | 3.17 |
| **280K** | 1.8 | 1.017 | 0.113 | 5.23 | 3.82 | 0.187 | 1.622 |
| **298K** | 0.128 | 4.9 | 1.93 | 0.96 | 3.74 | 0.17 | 1.57 |

### Fig. S1. The first round of high-throughput experimental thickness statistical thermal map.

Each thickness value is the expected value of the normal distribution under that condition. On average, the thickness values that can be measured under each condition are more than 20.

### Fig. S. The optical characterization of the pure 2D perovskite component films used in the first round of high-throughput experiments.

**(a~c)** Absorption spectra of L2PbBr4, L2PbI4, L2SnI4; **(d~f)** Photoluminescence spectra of L2PbBr4, L2PbI4, L2SnI4; **(g~i)** Time-resolved photoluminescence spectra of L2PbBr4, L2PbI4, L2SnI4.

### Fig. S3. Using the database obtained from the first round of high-throughput experiments to construct and train the machine learning model, and to output the recommended values of feature parameters for the next round of experiments.

**(a)** R2, MAE, RMSE of the training set and test set of the random forest model, **(b)** Correlation analysis and ranking of each feature value, **(c)** Distribution of the training data set and the prediction data set. **(d~i)** Distribution of the data range for predicting six feature values using the first round experimental data set when the result range is 3 − 8 nm.

### Fig. S4. The second round of high-throughput experiment thickness statistical heat map.

Each thickness value is the expected value of the normal distribution under that condition. On average, the thickness values that can be measured under each condition are more than 20.

### Fig. S. Using the databases obtained from the first and second rounds of high-throughput experiments for training the machine learning model and outputting the recommended values of feature parameters for the next round of experiments.

**(a)** R2, MAE, RMSE of the training set and test set of the random forest model, **(b)** Correlation analysis and ranking of each feature value, **(c)** Distribution of the training data set and the prediction data set. **(d~i)** Distribution of the data range for predicting six feature values using the first and second round experimental data sets when the result range is 3 − 5 nm.

### Fig. S. The third round of high-throughput experimental thickness statistical heat map.

Each thickness value is the expected value of the normal distribution under that condition. On average, the thickness values that can be measured under each condition are more than 20.

### Fig. S. The machine learning model was trained using databases obtained from the first, second and third high-throughput experiments, and the recommended values of the feature parameters for the next round of experiments were output.

**(a)** R2, MAE, RMSE of the training set and test set of the random forest model; **(b)** Correlation analysis and ranking of each feature value; **(c)** Distribution of the training data set and the prediction data set. **(d~i)** Distribution of the data range for predicting six feature values using the first, second, and third round experimental data sets when the result range is 3 − 5 nm.

### Fig. S. The thickness statistics of the single crystals from the fourth round experiment and the XRD of this component.

**(a)** The thickness statistics obtained from the single-crystal AFM test of the fourth round experiment, **(b)** XRD of the three-component films, and they were calibrated using the standard cards ((DDA)2PbI4 <96-705-1991>, (HAD)2PbI4 <96-705-1995>, (ODA)2PbI4 <96-705-1997>).

### Fig. S. Two-dimensional optical microscopic imaging of calcium phosphate single crystals with near-unit-cell thickness, SEM, AFM, and surface thickness.

The (DDA)2Pb0.1Sn0.9(Br0.1I0.9)4 single crystal with a thickness of 10 nm (1.5 crystal cell lengths) obtained under 100℃ and 600-fold dilution condition shows **(a)** optical microscopic imaging, **(b)** SEM, **(c)** AFM, and **(d)** surface thickness; (HDA)2Pb0.1Sn0.9(Br0.1I0.9)4 single crystal with a thickness of 6 nm (1 crystal cell length) obtained under 90℃ and 600-fold dilution condition shows **(e)** optical microscopic imaging, **(f)** SEM, **(g)** AFM, and **(h)** surface thickness; (ODA)2Pb0.1Sn0.9(Br0.1I0.9)4 single crystal with a thickness of 7 nm (1 crystal cell length) obtained under 100℃ and 600-fold dilution condition shows **(i)** optical microscopic imaging, **(j)** SEM, **(k)** AFM, and **(l)** surface thickness. The OM scale is 20 μm.

### Fig. S10 Two-dimensional perovskite single-crystal at near-cellular thickness imaging by optical microscopy and SEM.

Optical microscopic imaging of **(a)** (DDA)2Pb0.1Sn0.9(Br0.1I0.9)4 single crystal with a thickness of 4 nm (one unit cell length) was obtained at 90 ℃ and 600-fold dilution condition; **(b)** (HDA)2Pb0.1Sn0.9(Br0.1I0.9)4 single crystal with a thickness of 9 nm (1.5 unit cell lengths) was obtained at 100℃ and 600-fold dilution condition; **(c)** (ODA)2Pb0.1Sn0.9(Br0.1I0.9)4 single crystal with a thickness of 13 nm (2 unit cell lengths) was obtained at 90 ℃ and 600-fold dilution condition. **(d)** SEM of (ODA)2Pb0.1Sn0.9(Br0.1I0.9)4 single crystal obtained at above conditions. The OM scale is 20 μm, SEM scale is 1 μm.

### Fig. S. TRPL and power-dependent PL intensity of ultrathin single crystals.

**(a)** TRPL spectra of (DDA)2Pb0.1Sn0.9(Br0.1I0.9)4, (HDA)2Pb0.1Sn0.9(Br0.1I0.9)4, and (ODA)2Pb0.1Sn0.9(Br0.1I0.9)0.4 single crystals at 500 nm and 680 nm. **(b)** The variation trend of PL emission intensity of (DDA)2Pb0.1Sn0.9(Br0.1I0.9)4 single crystal at the two temperatures.

**Fig. S12. Power-dependent PL spectra of (HDA)2Pb0.1Sn0.9(Br0.1I0.9)4 single crystal.**

The power-dependent PL spectra of (HDA)2Pb0.1Sn0.9(Br0.1I0.9)4 single crystal at **(a)** room temperature and **(b)** low temperature. **(c)** The variation trend of PL emission intensity at the two temperatures indicates that the excitation threshold of (HDA)2Pb0.1Sn0.9(Br0.1I0.9)4 single crystal is 3.65 nJ mm-2.

**Fig. S13. The PL and TRPL spectra of the (HDA)2Pb0.1Sn0.9(Br0.1I0.9)4 single crystal**

**(a)** The temperature-dependent PL spectrum of the (HDA)2Pb0.1Sn0.9(Br0.1I0.9)4 single crystal shows that the PL intensity in the red light region increases as the temperature decreases, and the peak shifts to 700 nm towards the red. The upper left is the FLIM of the single crystal. The scale bar is 50 μm. **(b)** The PL spectrum of the (HDA)2Pb0.1Sn0.9(Br0.1I0.9)4 single crystal at room temperature was fitted, resulting in a direct transition emission around 610 nm and an edge state emission around 700 nm. **(c)** The temperature-dependent TRPL spectrum of the emission at around 680 nm. As the temperature decreases, the exciton lifetime increases. **(d)** The temperature-dependent TRPL spectrum of the emission at around 500 nm. As the temperature decreases, the exciton lifetime also increases, but the increase is smaller than that of the emission at 680 nm.

**Fig. S14. Photoelectric characterization of the (ODA)2Pb0.1Sn0.9(Br0.1I0.9)4 single crystal.**

The power-dependent PL spectra of (ODA)2Pb0.1Sn0.9(Br0.1I0.9)4 single crystal at **(a)** room temperature and **(b)** low temperature; **(c)** the trend of PL emission intensity at the two temperatures shows that the excitation threshold of (ODA)2Pb0.1Sn0.9(Br0.1I0.9)4 single crystal is 4.21 nJ mm-2. **(d)** The temperature-dependent PL spectrum of (ODA)2Pb0.1Sn0.9(Br0.1I0.9)4 single crystal, with the decrease of temperature, the PL intensity in the red region increases, and the peak shifts to 700 nm. The left upper part is the FLIM of the single crystal. The scale is 50 μm. **(e)** The fitting of the PL spectrum of (ODA)2Pb0.1Sn0.9(Br0.1I0.9)4 single crystal at room temperature yields direct transition emission around 600 nm and edge-state emission around 650 nm. **(f)** The temperature-dependent TRPL spectrum of the emission around 600 nm, with the decrease of temperature, the exciton lifetime increases. **(g)** The temperature-dependent TRPL spectrum of the emission around 504 nm, with the decrease of temperature, the exciton lifetime also increases, but the increase amplitude is smaller than that of the emission around 600 nm. **(h)** The maximum full-width at half-maximum and intensity value change trends of the PL spectra of (DDA)2Pb0.1Sn0.9(Br0.1I0.9)4, (HDA)2Pb0.1Sn0.9(Br0.1I0.9)4, and (ODA)2Pb0.1Sn0.9(Br0.1I0.9)4 single crystals under temperature variation conditions.

**Fig. S15. Bandgap control under a given number of stacking layers.**

When N = 4, (a) AFM and (b) surface height of (NA)2PbBr4; (c) AFM and (d) surface height of (NA)2PbI4; (e) AFM and (f) surface height of (DDA)2SnI4 single crystal.

### Reference

1 Clark, S. J. *et al.* First principles methods using CASTEP. *Zeitschrift für Kristallographie - Crystalline Materials* **220**, 567-570 (2005). https://doi.org/10.1524/zkri.220.5.567.65075

2 Delley, B. An all-electron numerical method for solving the local density functional for polyatomic molecules. *The Journal of Chemical Physics* **92**, 508-517 (1990). https://doi.org/10.1063/1.458452

3 Delley, B. From molecules to solids with the DMol3 approach. *The Journal of Chemical Physics* **113**, 7756-7764 (2000). https://doi.org/10.1063/1.1316015

4 Booker, E. P. *et al.* Formation of Long-Lived Color Centers for Broadband Visible Light Emission in Low-Dimensional Layered Perovskites. *Journal of the American Chemical Society* **139**, 18632-18639 (2017). https://doi.org/10.1021/jacs.7b10223

5 Du, K.-Z. *et al.* Two-Dimensional Lead(II) Halide-Based Hybrid Perovskites Templated by Acene Alkylamines: Crystal Structures, Optical Properties, and Piezoelectricity. *Inorganic Chemistry* **56**, 9291-9302 (2017). https://doi.org/10.1021/acs.inorgchem.7b01094

6 Smith, M. D., Jaffe, A., Dohner, E. R., Lindenberg, A. M. & Karunadasa, H. I. Structural origins of broadband emission from layered Pb–Br hybrid perovskites. *Chemical Science* **8**, 4497-4504 (2017). https://doi.org/10.1039/c7sc01590a

7 Takahashi, Y. *et al.* Tunable Charge Transport in Soluble Organic–Inorganic Hybrid Semiconductors. *Chemistry of Materials* **19**, 6312-6316 (2007). https://doi.org/10.1021/cm702405c
